# Supplementary material
Source: PubMed Central journal article supplement (PMC4402390)
Supplement: JB.02475-14_zjb999093609so1.pdf [file JB.02475-14_zjb999093609so1.pdf]

**Table S1. Oligodeoxynucleotides used in this work: Probes for Northern blot analysis and primers for cloning, site directed mutagenesis and qRT-PCR**

| Name                                                            | Sequence                                                                            | Purpose                                                                                                                                                            |
|-----------------------------------------------------------------|-------------------------------------------------------------------------------------|--------------------------------------------------------------------------------------------------------------------------------------------------------------------|
| <b>Probes for Northern Blot</b>                                 |                                                                                     |                                                                                                                                                                    |
| p-0680a                                                         | 5'-CGTCGCGCTGCTGCTACAGTC-3'                                                         | 24 nt probe for CcsR1 (1)                                                                                                                                          |
| pCcsR1 (73 nt)                                                  | 5'-AAGGACGGGACACACAGGGAGGAGAGGCGTCCGCGTCTGCTACAGTCCCGGAGGAGTGGGACCTC-3              | 83 nt probe for CcsR1 for differential detection of CcsR1-3, based on sequence determined in [1]                                                                   |
| pCcsR2 (80 nt)                                                  | 5'-TGGTGCAGCGACCCACAGGGAGGAGGGGCGCTGCGGTTCCGATCCGCGAGGGAGGAGAGCCGTGCGAAGAGG-3       | 80 nt probe for CcsR2 for differential detection of CcsR1-3 based on sequence determined in [1]                                                                    |
| pCcsR3 (88 nt)                                                  | 5'-GGGGCGCAGCTCCAGGGAGGAGGAGGCGCCGCTGCTATCCGACCCCGGGAGGAGGTGCGATCCCGAAGTCAGTGGGCA-3 | 88 nt probe for CcsR3 for differential detection of CcsR1-3 based on sequence determined in [1]                                                                    |
| p-1543                                                          | 5'-CAGGGAGGTATGAAGCGGACGAG-3'                                                       | Probe for R5s1543                                                                                                                                                  |
| p-55                                                            | 5'-CTTGAGACGCATCATTG-3'                                                             | Probe for 5S rRNA (1)                                                                                                                                              |
| <b>Primer for Cloning</b>                                       |                                                                                     |                                                                                                                                                                    |
| RSP_4352_5'_HindIII_fw                                          | 5'-AAGCTTCAGTCCGGCGAAGG-3'                                                          | Cloning of 16S rRNA (RSP_4352 Promoter) into pPHU235, forward primer                                                                                               |
| RSP_4352_5'_BamHI_rv                                            | 5'-GGATCCGTTTCTAGGAGCAGACGGCC-3'                                                    | Cloning of 16S rRNA (RSP_4352 Promoter) into pPHU235, reverse primer                                                                                               |
| RSP_6037_for_BamHI                                              | 5'-GGATCCAACACGGCGACGGCAAG-3'                                                       | Cloning of RSP_6037 + CcsR1-4 into pRK4352, forward primer                                                                                                         |
| CcsR1_for_BamHI                                                 | 5'-GGATCCCTTCTGCGAGGTCCAC-3'                                                        | Cloning of CcsR1, CcsR1+2, CcsR1-3 and CcsR1-4 into pRK4352/pBBR4352, forward primer                                                                               |
| CcsR1-rev-EcoRI                                                 | 5'-GAATTCAAAGGACGGCGACACAG-3'                                                       | Cloning of CcsR1 into pRK4352, reverse primer                                                                                                                      |
| CcsR2-for-BamHI                                                 | 5'-GGATCCCTTCGAAACGGCTCC-3'                                                         | Cloning of CcsR2 into pRK4352, forward primer                                                                                                                      |
| CcsR2-rev-EcoRI                                                 | 5'-GAATTCATCTGGTGCAGCGACC-3'                                                        | Cloning of CcsR2 and CcsR1+2 into pRK4352, reverse primer                                                                                                          |
| CcsR3-rev-EcoRI                                                 | 5'-GAATTCGGGGGCGACGGCTCC-3'                                                         | Cloning of CcsR1-3 into pRK4352, reverse primer                                                                                                                    |
| CcsR4_rev_XbaI                                                  | 5'-TCTAGACTCATCGGCGCATGAAT-3'                                                       | Cloning of CcsR1-4 into pBBR4352, reverse primer                                                                                                                   |
| CcsR4_rev_EcoRI                                                 | 5'-GAATTCCTCATCGGCGCATGAATC-3'                                                      | Cloning of RSP_6037 + CcsR1-4 / CcsR1-4 into pRK4352, reverse primer                                                                                               |
| up2591Kpn-f                                                     | 5'-GGTACCCCTGGGCGCGATGATC-3'                                                        | Cloning of <i>flhR</i> upstream fragment, forward primer                                                                                                           |
| up2591Pst-r                                                     | 5'-CTGCAGCTCTTCCCGCTTCCGCGC-3'                                                      | Cloning of <i>flhR</i> upstream fragment, reverse primer                                                                                                           |
| down2591Pst-f                                                   | 5'-CTGACGGGAGCGTCCGCTGACGACAGA-3'                                                   | Cloning of <i>flhR</i> downstream fragment, forward primer                                                                                                         |
| down2591Hind-r                                                  | 5'-AAGCTTCATCCGGCTCCCGAGGGGT-3'                                                     | Cloning of <i>flhR</i> downstream fragment, reverse primer                                                                                                         |
| RSP_2591_Xba_fw                                                 | 5'-TCTAGACGGCAACATTTGCCGCC-3'                                                       | Cloning 166 bp 5'-UTR and 1st 18 bases of RSP_2591 into pPHU165 for lacZ fusion, forward primer                                                                    |
| RSP_2591_Pst_rv                                                 | 5'-CTGACCTCCGAAACATGTCCTC-3'                                                        | Cloning 166bp 5'-UTR and 1st 18 bases of RSP_2591 into pPHU165 for lacZ fusion, reverse primer                                                                     |
| RSP_2876_Xba_fw                                                 | 5'-TCTAGAACATTCTGCGTCCAC-3'                                                         | Cloning 204 bp in 5' direction from ATG and 1st 18 bases of RSP_2876 into pPHU165 for lacZ fusion, forward primer                                                  |
| RSP_2876_Pst_rv                                                 | 5'-CTGCAGCAGGTGCAAAATTGT-3'                                                         | Cloning 204 bp in 5' direction from ATG and 1st 18 bases of RSP_2876 into pPHU165 for lacZ fusion, reverse primer                                                  |
| RSP_2877_Xba_fw                                                 | 5'-TCTAGATCACCACGGCCTCCA-3'                                                         | Cloning 233 bp in 5' direction from ATG and 1st 18 bases of RSP_2877 into pPHU165 for lacZ fusion, forward primer                                                  |
| RSP_2877_Pst_rv                                                 | 5'-CTGCAGGCTCCGCTCTT-3'                                                             | Cloning 233 bp in 5' direction from ATG and 1st 18 bases of RSP_2877 into pPHU165 for lacZ fusion, reverse primer                                                  |
| RSP_4050_Xba_fw                                                 | 5'-TCTAGATCTCGAAGACCGCG-3'                                                          | Cloning first 69 bp of RSP_4050 (pDhB) and 80 bp in 5' direction from ATG into pPHU165 for lacZ fusion, forward primer                                             |
| RSP_4050_Pst_rv                                                 | 5'-CTGCAGCAGCCATTTCCGCA-3'                                                          | Cloning first 69 bp of RSP_4050 (pDhB) and 80 bp in 5' direction from ATG into pPHU165 for lacZ fusion, reverse primer                                             |
| RSP_6132_Xba_fw                                                 | 5'-TCTAGACCGCCATCCGCCCTC-3'                                                         | Cloning 180 bp 5'-UTR and 1st 18 bases of RSP_6132 into pPHU165 for lacZ fusion, forward primer                                                                    |
| RSP_6132_Pst_rv                                                 | 5'-CTGCAGCGGGTCTTCCAGG-3'                                                           | Cloning 180 bp 5'-UTR and 1st 18 bases of RSP_6132 into pPHU165 for lacZ fusion, reverse primer                                                                    |
| 2591lovfbam1                                                    | 5'-GGATCCCTGCCCCGGAAGGGAAC-3'                                                       | Cloning of <i>flhR</i> into pRK4352, forward primer                                                                                                                |
| 2591lovRpn1                                                     | 5'-GGTACCCCGCGCAAGATCCGCG-3'                                                        | Cloning of <i>flhR</i> into pRK4352, reverse primer                                                                                                                |
| Mut2591GGA27CCTfw                                               | 5'-GGGAGGACCTAGCCCGCGGAAACGGG-3                                                     | Base exchange in RSP_2591 GGA27 to CCT27 for analysis in pPHU165, forward primer                                                                                   |
| Mut2591GGA27CCTrv                                               | 5'-CGGGCTAGGCTCCCTCCGCGGCTCTC-3'                                                    | Base exchange in RSP_2591 GGA27 to CCT27 for analysis in pPHU165, reverse primer                                                                                   |
| <b>Primer for generation of templates for T7-RNA polymerase</b> |                                                                                     |                                                                                                                                                                    |
| T7_CcsR1_f                                                      | 5'-TAATACGACTACTATAGAGTCCACCTCCTCCTC-3'                                             | Amplification of a DNA fragment consisting of a T7 promoter and the 83 bp stretch encoding CcsR1 based on [1], forward primer                                      |
| T7_CcsR1_r                                                      | 5'-AAGGACGGGACACACAGGG-3'                                                           | Amplification of a DNA fragment consisting of a T7 promoter and the 83 bp stretch encoding CcsR1 based on [1], reverse primer                                      |
| T7_PcrZ_f                                                       | 5'-TAATACGACTACTATAGGCGCACCCGGAGTGGTAAC-3'                                          | Amplification of a DNA fragment consisting of a T7 promoter and ta 135 bp stretch encoding PcrZ, forward primer                                                    |
| T7_PcrZ_r                                                       | 5'-GCAGCGAAGGATGCCGACAG-3'                                                          | Amplification of a DNA fragment consisting of a T7 promoter and ta 135 bp stretch encoding PcrZ, reverse primer                                                    |
| T7_2591_f                                                       | 5'-TAATACGACTACTATAGGTTGCCCGCAAGGGAAC-3'                                            | Amplification of a DNA fragment consisting of a T7 promoter and a 177 bp stretch encoding the putative CcsR1 binding site in the <i>flhR</i> 5'UTR, forward primer |
| T7_2591_r                                                       | 5'-TCCCGAAACATGTCCATC-3'                                                            | Amplification of a DNA fragment consisting of a T7 promoter and a 177 bp stretch encoding the putative CcsR1 binding site in the <i>flhR</i> 5'UTR, reverse primer |
| T7_0285_f                                                       | 5'-TAATACGACTACTATAGCCCGCTCGCATGGAG-3'                                              | Amplification of a DNA fragment consisting of a T7 promoter and a 130 bp stretch encoding a putative PcrZ binding site for bchN, forward primer                    |
| T7_0285_r                                                       | 5'-GATGATGCCGGTCAGTCCGC-3'                                                          | Amplification of a DNA fragment consisting of a T7 promoter and a 130 bp stretch encoding a putative PcrZ binding site for bchN, reverse primer                    |
| <b>Primer for qRT-PCR</b>                                       |                                                                                     |                                                                                                                                                                    |
| RSP2576up                                                       | 5'-GGTCATGGTGCAGATCAAGG-3'                                                          | Forward primer for qRT-PCR RSP_2576                                                                                                                                |
| RSP2576down                                                     | 5'-AGGTTGCTCTCTGCTGAG-3'                                                            | Reverse primer for qRT-PCR RSP_2576                                                                                                                                |
| 2580RT-F                                                        | 5'-GATCCGGGCTCTCTGCG-3'                                                             | Forward primer for qRT-PCR RSP_2580                                                                                                                                |
| 2580RT-R                                                        | 5'-CAGGGGCGAATTCGCGG-3'                                                             | Reverse primer for qRT-PCR RSP_2580                                                                                                                                |
| 2579RT-F                                                        | 5'-CATCCGCTGTTCAATGC-3'                                                             | Forward primer for qRT-PCR RSP_2579                                                                                                                                |
| 2579RT-R                                                        | 5'-CAGACATGGCACTCCGAC-3'                                                            | Reverse primer for qRT-PCR RSP_2579                                                                                                                                |
| 2877_real-A                                                     | 5'-TACGAGCAGGCCAAGGAT-3'                                                            | Forward primer for qRT-PCR RSP_2877                                                                                                                                |
| 2877_real-B                                                     | 5'-GGCGGTTGTTACCAAGTT-3'                                                            | Reverse primer for qRT-PCR RSP_2877                                                                                                                                |
| RSP4050_real_Up                                                 | 5'-AAGTCGACCCGACGAATA-3'                                                            | Forward primer for qRT-PCR RSP_4050                                                                                                                                |
| RSP4050_real_Dwn                                                | 5'-ATCATGGTGGCGGCTCGTAT-3'                                                          | Reverse primer for qRT-PCR RSP_4050                                                                                                                                |
| 6132RT-F                                                        | 5'-GGAAGACCCCGTTAC-3'                                                               | Forward primer for qRT-PCR RSP_6132                                                                                                                                |
| 6132RT-R                                                        | 5'-CTTGGCTTGGCGAGG-3'                                                               | Reverse primer for qRT-PCR RSP_6132                                                                                                                                |

**Table S2. Plasmids used in this work**

| Plasmid                     | Description                                                                                                                                                                                                                                          | Source            |
|-----------------------------|------------------------------------------------------------------------------------------------------------------------------------------------------------------------------------------------------------------------------------------------------|-------------------|
| pRK415                      | broad-host-range cloning vector, Tc <sup>r</sup>                                                                                                                                                                                                     | see (2)           |
| pRK4352                     | pRK415 with the RSP_4352 16S rRNA promoter, Tc <sup>r</sup>                                                                                                                                                                                          | see (3)           |
| pRCcsR1                     | pRK4352 with the sRNA Ccsr1 under control of the RSP_4352 16S rRNA promoter, Tc <sup>r</sup>                                                                                                                                                         | This study        |
| pRCcsR2                     | pRK4352 with the sRNA Ccsr2 under control of the RSP_4352 16S rRNA promoter, Tc <sup>r</sup>                                                                                                                                                         | This study        |
| pRCcsR1+2                   | pRK4352 with the 2 sRNAs Ccsr1+2 under control of the RSP_4352 16S rRNA promoter, Tc <sup>r</sup>                                                                                                                                                    | This study        |
| pRCcsR1-3                   | pRK4352 with the 3 sRNAs Ccsr1-3 under control of the RSP_4352 16S rRNA promoter, Tc <sup>r</sup>                                                                                                                                                    | This study        |
| pRCcsR1-4                   | pRK4352 with the 4 sRNAs Ccsr1-4 under control of the RSP_4352 16S rRNA promoter, Tc <sup>r</sup>                                                                                                                                                    | This study        |
| pR6037_CcsR1-4              | pRK4352 with RSP_6037 and the 4 sRNAs Ccsr1-4 under control of the RSP_4352 16S rRNA promoter, Tc <sup>r</sup>                                                                                                                                       | This study        |
| pRK_flhR                    | pRK4352 with RSP_2591 under control of the RSP_4352 16S rRNA promoter, Tc <sup>r</sup>                                                                                                                                                               | This study        |
| pBBR4352                    | pBBR1MCS2 with the RSP_4352 16S rRNA promoter, Km <sup>r</sup>                                                                                                                                                                                       | see (3)           |
| pBCcsR1-4                   | pBBR4352 with the 4 sRNAs Ccsr1-4 under control of the RSP_4352 16S rRNA promoter, Km <sup>r</sup>                                                                                                                                                   | This study        |
| pPHU281                     | Tc <sup>r</sup>                                                                                                                                                                                                                                      | see (5)           |
| pUC4K                       | Km <sup>r</sup>                                                                                                                                                                                                                                      |                   |
| pPHU2591up-KM-down          | pPHU281 with RSP_2591 ( <i>flhR</i> ) upstream and downstream fragments flanking the Km-resistance cassette from pUC4K, Tc <sup>r</sup>                                                                                                              | this study        |
| pPHU235                     | broad-host-range <i>lacZ</i> -fusion vector, Tc <sup>r</sup>                                                                                                                                                                                         | see (6)           |
| pPHU16S                     | pPHU235 with the RSP_4352 16S rRNA promoter, Tc <sup>r</sup>                                                                                                                                                                                         | This study        |
| pPHU16S2591                 | pPHU16S with the first 18bp of RSP_2591 ( <i>flhR/afdR</i> ) and 166 bp of the 5' region with a putative CcsR1 binding site in a <i>lacZ</i> fusion under control of the 16S rRNA promoter                                                           | This study        |
| pPHU16S2591 <sub>mut3</sub> | pPHU16S with the first 18bp of RSP_2591 ( <i>flhR/afdR</i> ) and 166 bp of the 5' region with a putative CcsR1-4 binding site in a <i>lacZ</i> fusion under control of the 16S rRNA promoter, triple mutation in the CcsR1-4 interaction site        | This study        |
| pPHU16S2876                 | pPHU16S with the last 194 bp of RSP_2877 with parts of a putative CcsR1 binding site, the 10bp UTR between RSP_2877 and RSP_2876 and the first 18 bp of RSP_2876 in a <i>lacZ</i> fusion under control of the RSP_4352 16S rRNA promoter             | This study        |
| pPHU16S2877                 | pPHU16S with the last 205 bp of RSP_2878, the 28 bp UTR between RSP_2878 and RSP_2877 including a putative CcsR1 binding site and the first 18bp of RSP_2877 ( <i>coxL</i> ) in a <i>lacZ</i> fusion under control of the RSP_4352 16S rRNA promoter | This study        |
| pPHU16S4050                 | pPHU16S with the first 69 bp of RSP_4050 ( <i>pdhB</i> ) including a putative CcaR1-4 binding site and 80 bp of the respective 5' region in a <i>lacZ</i> fusion under control of the RSP_4352 16S rRNA promoter                                     | This study        |
| pPHU16S6132                 | pPHU16S with the first 18 bp of RSP_6132( <i>pqqA</i> ) and 180 bp of the 5' region with a putative CcaR1-4 binding site in a <i>lacZ</i> fusion under control of the 16S rRNA promoter                                                              | This study        |
| pPHU16S <i>bchN</i>         | pPHU4352 with the first 60 bp of <i>bchN</i> (RSP_0285) and 105 bp of the 5' region with a putative binding site for the sRNA PcrZ in a <i>lacZ</i> fusion under control of the 16S rRNA promoter                                                    | see (3)           |
| pDrive cloning vector       | Ap <sup>r</sup> , Km <sup>r</sup>                                                                                                                                                                                                                    | Quigen            |
| pJet1.2 cloning vector      | Ap <sup>r</sup>                                                                                                                                                                                                                                      | Thermo Scientific |

**Table S3. Bacterial strains used in this work**

| Strain                                           | Description                                                   | Antibiotics ( $\mu\text{g ml}^{-1}$ ) | Source              |
|--------------------------------------------------|---------------------------------------------------------------|---------------------------------------|---------------------|
| <b><i>E. coli</i></b>                            |                                                               |                                       |                     |
| <i>E. coli</i> JM109                             | <i>recA1 supE44 endA1 hsdR17 gyrA96 relA1 thi (lac-proAB)</i> | -                                     | New England Biolabs |
| <i>E. coli</i> S17-1                             | <i>recA pro hsdR RP4-2-Tc::Mu-Km::Tn7</i>                     | -                                     | See (7)             |
| <b><i>R. sphaeroides</i></b>                     |                                                               |                                       |                     |
| <i>R. sphaeroides</i> 2.4.1                      | Wild type                                                     | -                                     | See (8)             |
| <i>R. sphaeroides</i> 2.4.1 $\Delta$ <i>hfq</i>  | <i>hfq</i> mutation in wild type 2.4.1, Sp <sup>r</sup>       | Spectinomycin (10)                    | See (9)             |
| <i>R. sphaeroides</i> 2.4.1 $\Delta$ <i>flhR</i> | <i>flhR</i> mutation in wild type 2.4.1, Km <sup>r</sup>      | Kanamycin (25)                        | This study          |

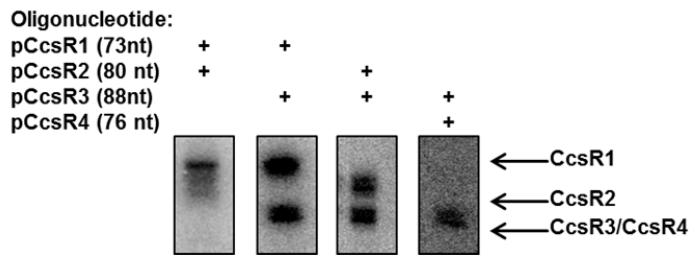

**Figure S1: Differential detection of CcsR1-3/4.** Depicted are data from Northern blot experiments of *R. sphaeroides* 2.4.1 under heat stress conditions. CcsR1-4 were detected using specific probes for the individual sRNAs. Specific detection of CcsR1 and 2 was possible while CcsR3+4 showed cross hybridization of their respective probes.

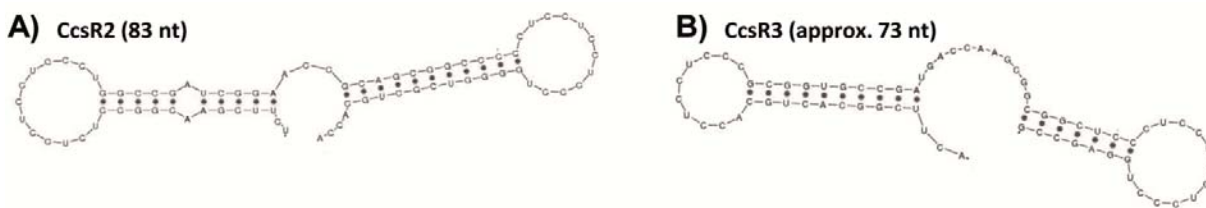

**Figure S2. Predicted secondary structures of CcsR2 and CcsR3:** A)+B) Displayed are minimum free energy (MFE) structures of CcsR2+3. Dots in the base pairing regions indicate that the predicted base interactions occur in the MFE structures as well as in the predicted centroid structures. All secondary structures depicted in this figure were created using Sfold (9).

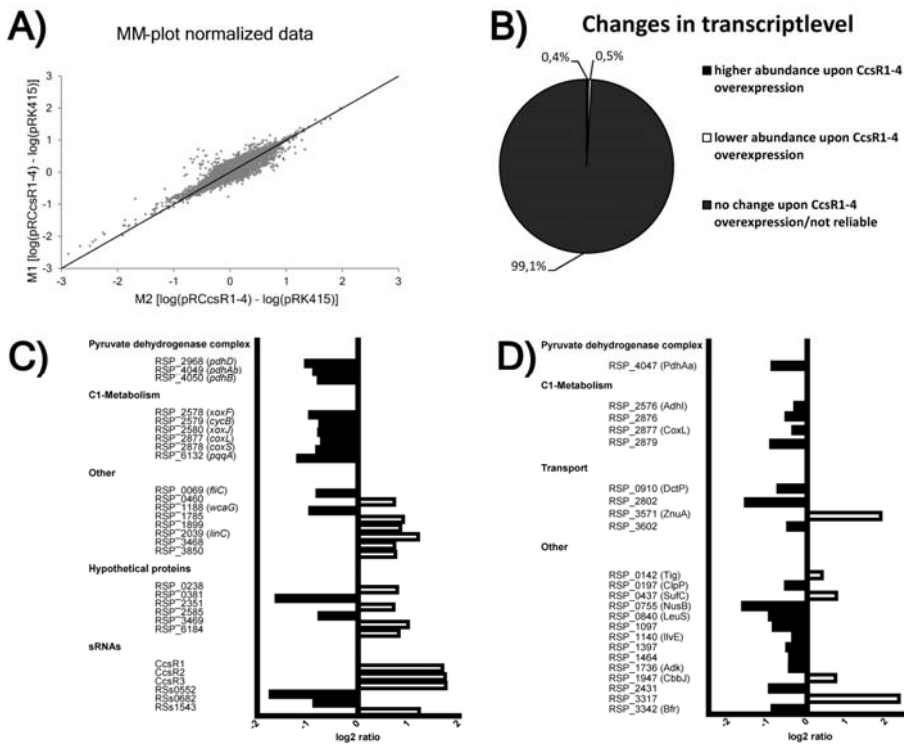

**Figure S3. Global analysis of the transcriptome data of *R. sphaeroides* 2.4.1 (pRCcsR1-4) vs. *R. sphaeroides* 2.4.1 (pRK415).** Depicted are data from a microarray analysis and a gel based proteome analysis comparing *R. sphaeroides* (pRCcsr1-4) to the control strain *R. sphaeroides* (pRK415) under aerobic conditions in early exponential growth phase. Two individual microarrays (biological replicates) were hybridized to two different pools of RNAs from three independent experiments for each strain. The data of the microarray analysis have been deposited in NCBI's Gene Expression Omnibus (10) and are accessible through GEO Series accession number XY (will be provided in the final manuscript). A) MM-plot comparing the log ratios between the two replicates. Displayed is the log ratio of biological replicate one (M1) against the log ratio of technical replicate two (M2) B) 0.4% of the transcripts with reliable A-Value showed higher abundance ( $\log_2(\text{ratio}) \geq 0.7$ ) in *R. sphaeroides* (pRCcsr1-4) in comparison to the control strain, while 0.5% of the transcripts showed lower abundance ( $\log_2(\text{ratio}) \leq -0.7$ ). C) Genes with changed RNA abundance in the microarray D) Genes with changed protein abundance in the proteome analysis ( $\log_2(\text{ratio}) \leq -0.3$ ;  $p \leq 0.05$  or  $\log_2(\text{ratio}) \geq 0.3$ ;  $p \leq 0.05$ )

**Table S4. Whole genome sRNA-mRNA interaction predictions for CcsR1-4:** Whole genome sRNA-mRNA interaction predictions were employed for CcsR1-4 with help of INTARNA (11). In order to increase the reliability of the prediction, a whole genome interaction prediction for CcsR1 by RNAPREDATOR was conducted (12). The data show sRNA-mRNA interaction predictions that indicate a redundant function of three or 4 of the sRNAs on the same messenger RNA. For these redundant interaction predictions high amounts of free energy are typical. Also these interactions are predicted by INTARNA as well as by RNAPREDATOR. On the other hand there are predicted interactions that indicate unique target mRNAs for CcsR1. Predicted interaction partners of CcsR1-4 that were tested in the *in vivo* reporter system are highlighted in bold.

| Gene            | Name               | Function                                                              | IntaRNA                       |                               |                               |                               | RNApredator                   |
|-----------------|--------------------|-----------------------------------------------------------------------|-------------------------------|-------------------------------|-------------------------------|-------------------------------|-------------------------------|
|                 |                    |                                                                       | CcsR1<br>Energy<br>[kcal/mol] | CcsR2<br>Energy<br>[kcal/mol] | CcsR3<br>Energy<br>[kcal/mol] | CcsR4<br>Energy<br>[kcal/mol] | CcsR1<br>Energy<br>[kcal/mol] |
| Redundant hits  |                    |                                                                       |                               |                               |                               |                               |                               |
| RSP_6040        |                    | Hypothetical protein                                                  | -27.4                         | -27.4                         | -25.6                         | -25.6                         | -22.70                        |
| RSP_2255        |                    | AMP-binding domain protein                                            | -22.7                         | -22.7                         | -21.9                         | -21.9                         |                               |
| RSP_1576        | <i>trxB</i>        | Thioredoxin reductase                                                 | -22                           | -22.6                         | -21.2                         | -21.3                         | -19.59                        |
| <b>RSP_2591</b> | <b><i>fthR</i></b> | <b>Two component LuxR family transcriptional regulator</b>            | <b>-21.8</b>                  | <b>-24.3</b>                  | <b>-22.4</b>                  | <b>-22.4</b>                  | <b>-20.26</b>                 |
| RSP_1195        | <i>comF</i>        | Competence protein F                                                  | -21.7                         | -18.8                         | -23.3                         | -18.6                         |                               |
| RSP_2749        |                    | P4 family integrase                                                   | -21.5                         | -23.1                         | -27                           | -23.1                         |                               |
| RSP_2872        | <i>aglF</i>        | ABC alpha-glucoside transporter, inner membrane subunit AgIF          | -21.4                         | -22.7                         | -23.8                         | -23.8                         | -20.17                        |
| RSP_0573        | <i>phoB</i>        | Response regulator receiver protein                                   | -21.2                         | -21.2                         | -19.8                         | -19.8                         | -19.86                        |
| RSP_2844        |                    | putative GTP-binding protein                                          | -20.9                         | -20.9                         | -20.8                         | -20.8                         | -16.81                        |
| RSP_2365        |                    | ABC sugar (ribose) transporter, periplasmic substrate-binding subunit | -20.3                         | -20.3                         | -18.9                         | -18.9                         | -19.67                        |
| RSP_2669        |                    | ABC sugar (glycerol) transporter, ATPase subunit                      | -19.7                         | -17.3                         | -17.3                         | -17.3                         |                               |
| <b>RSP_6132</b> | <b><i>pqqA</i></b> | <b>Coenzyme PQQ synthesis protein PqqA</b>                            | <b>-19.7</b>                  | <b>-19.7</b>                  | <b>-18.4</b>                  | <b>-18.4</b>                  | <b>-17.96</b>                 |
| RSP_2104        |                    | Hypothetical protein                                                  | -19.3                         | -21.1                         | -21.1                         | -21.1                         |                               |
| RSP_0793        | <i>pqqB</i>        | Pyroloquinoline quinone biosynthesis protein PqqB                     | -19.1                         | -19.1                         | -18.3                         | -18.3                         | -19.26                        |
| RSP_0488        | <i>uxaC</i>        | Glucuronate isomerase                                                 | -19                           | -19.7                         | -19.7                         | -19.7                         | -18.55                        |
| RSP_0725        |                    | thioredoxin, thioldisulfide interchange protein                       | -19                           | -19                           | -18.8                         | -18.8                         |                               |
| RSP_2939        |                    | Condensin subunit ScpB                                                | -18.8                         | -18.8                         | -17.9                         | -17.9                         |                               |
| <b>RSP_4050</b> | <b><i>pdhB</i></b> | <b>Branched-chain alpha-keto acid dehydrogenase subunit E2</b>        | <b>-18.2</b>                  | <b>-18.2</b>                  | <b>-17.3</b>                  | <b>-17.3</b>                  |                               |
| CcsR1 specific  |                    |                                                                       |                               |                               |                               |                               |                               |
| RSP_2719        |                    | AsnC family transcriptional regulator                                 | -20.3                         |                               |                               |                               |                               |
| RSP_0598        | <i>dut</i>         | deoxyuridine 5'-triphosphate nucleotidohydrolase                      | -19.6                         |                               |                               |                               |                               |
| <b>RSP_2876</b> |                    | <b>Putative carbon monoxide dehydrogenase medium chain</b>            | <b>-18.4</b>                  |                               |                               |                               |                               |
| RSP_2521        | <i>nuoG</i>        | NADH dehydrogenase subunit G                                          | -18.3                         |                               |                               |                               |                               |
| RSP_0487        |                    | TRAP dicarboxylate family transporter DctP subunit                    | -17.1                         |                               |                               |                               |                               |
| RSP_1438        |                    | Iron-hydroxamate transporter permease subunit                         | -17                           |                               |                               |                               |                               |
| CcsR2 specific  |                    |                                                                       |                               |                               |                               |                               |                               |
| RSP_2889        |                    | Transcriptional regulator                                             |                               | -22.2                         |                               |                               |                               |
| RSP_2376        | <i>kbl</i>         | 2-amino-3-ketobutyrate coenzyme A ligase                              |                               | -19.9                         |                               |                               |                               |
| RSP_2003        | <i>yibQ</i>        | YibQ protein                                                          |                               | -19                           |                               |                               |                               |
| RSP_2084        |                    | Hypothetical protein                                                  |                               | -18.7                         |                               |                               |                               |
| RSP_2526        | <i>nuoK</i>        | NADH dehydrogenase subunit K                                          |                               | -17.8                         |                               |                               |                               |
| RSP_1019        |                    | Putative glycolate oxidase subunit protein                            |                               | -17.7                         |                               |                               |                               |
| RSP_2381        |                    | 3-methyladenine DNA glycosylase                                       |                               | -17.2                         |                               |                               |                               |
| CcsR3 specific  |                    |                                                                       |                               |                               |                               |                               |                               |
| RSP_0640        |                    | Putative_N-methylhydantoinase A                                       |                               |                               | -24                           |                               |                               |
| RSP_1077        |                    | LysR family transcriptional regulator                                 |                               |                               | -19                           |                               |                               |
| RSP_6242        |                    | Hypothetical protein                                                  |                               |                               | -18.3                         |                               |                               |
| RSP_2480        |                    | Hypothetical protein                                                  |                               |                               | -17.3                         |                               |                               |
| CcsR4 specific  |                    |                                                                       |                               |                               |                               |                               |                               |
| RSP_2220        | <i>fliG</i>        | Flagellar motor switch protein                                        |                               |                               |                               | -16.7                         |                               |
| RSP_2932        | <i>hutC</i>        | GntR family transcriptional regulator                                 |                               |                               |                               | -16.5                         |                               |

1. **Berghoff BA, Glaeser J, Sharma CM, Vogel J, Klug G.** 2009. *Photooxidative stress-induced and abundant small RNAs in Rhodobacter sphaeroides.* Mol. Microbiol. **74**:1497–1512.
2. **Keen NT, Tamaki S, Kobayashi D, Trollinger D.** 1988. *Improved broad-host-range plasmids for DNA cloning in gram-negative bacteria.* Gene. **70**:191-197
3. **Mank NN, Berghoff BA, Hermanns YN, Klug G.** 2012. *Regulation of bacterial photosynthesis genes by the small noncoding RNA PcrZ.* Proc. Natl. Acad. Sci. U.S.A. **109**:16306–16311.
4. **Hübner P, Masepohl B, Klipp W, Bickle TA.** 1993. *nif gene expression studies in Rhodobacter capsulatus: ntrC-independent repression by high ammonium concentrations.* Mol Microbiol. **10**:123–132.
5. **Hübner P, Willison JC, Vignais PM, Bickle TA.** 1991. *Expression of regulatory nif genes in Rhodobacter capsulatus.* J. Bacteriol. **173**:2993–2999.
6. **Simon R, Priefer U, Pühler A.** 1983. *A Broad Host Range Mobilization System for In Vivo Genetic Engineering: Transposon Mutagenesis in Gram Negative Bacteria.* Nat Biotechnol **1**:784–791.
7. **van Niel CB.** 1944. *THE CULTURE, GENERAL PHYSIOLOGY, MORPHOLOGY, AND CLASSIFICATION OF THE NON-SULFUR PURPLE AND BROWN BACTERIA.* Bacteriol Rev **8**:1–118.
8. **Glaeser J, Zobawa M, Lottspeich F, Klug G.** 2007. *Protein synthesis patterns reveal a complex regulatory response to singlet oxygen in Rhodobacter.* J. Proteome Res. **6**:2460–2471.
9. **Ding Y, Chan CY, Lawrence CE.** 2004. *Sfold web server for statistical folding and rational design of nucleic acids.* Nucleic Acids Res. **32**:W135-41.
10. **Edgar R.** 2002. *Gene Expression Omnibus: NCBI gene expression and hybridization array data repository.* Nucleic Acids Research **30**:207–210.
11. **Smith C, Heyne S, Richter AS, Will S, Backofen R.** 2010. *Freiburg RNA Tools: a web server integrating INTARNA, EXPARNA and LOCARNA.* Nucleic Acids Res. **38**:W373-7.
12. **Eggenhofer F, Tafer H, Stadler PF, Hofacker IL.** 2011. *RNApredator: fast accessibility-based prediction of sRNA targets.* Nucleic Acids Research **39**:W149.
